# Supplementary material for: Pantropical and continental stand-level biomass models
Source: Research Square preprint supplement (doi:10.21203/rs.3.rs-6256560/v1), 2025-04-01
Supplement: Supplementary file 1 [file e38c2cc5bf73c2d1b67a1e7c.docx]

**Pantropical and continental stand-level biomass equations**

Supplementary file 1 – Forest structure of the 65000 simulated plots.


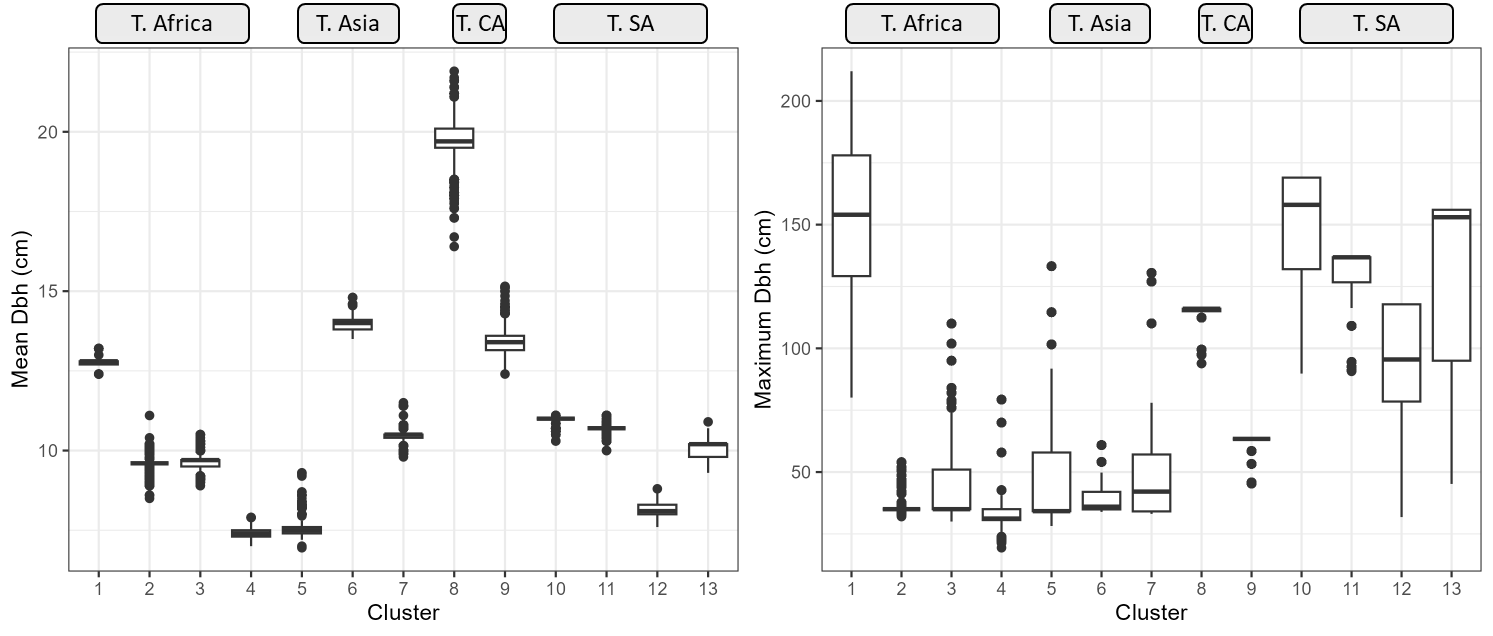


Fig. 1S. Box plots for the mean and maximum diameters at breast height of the trees in the 5000 forests simulated for each cluster. T. is Tropical. CA is Central America. SA is South America.


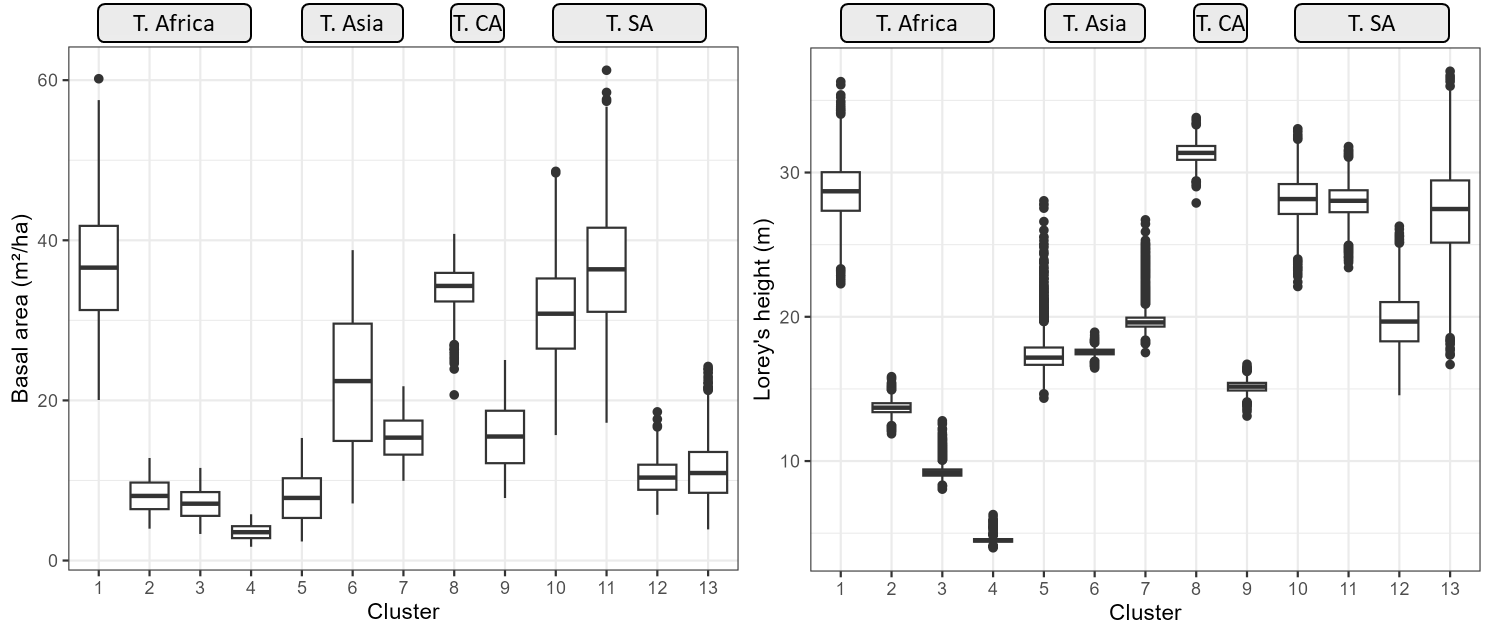


Fig. 2S. Box plots for the basal area and Lorey’s height of the 5000 forests simulated for each cluster. T. is Tropical. CA is Central America. SA is South America.


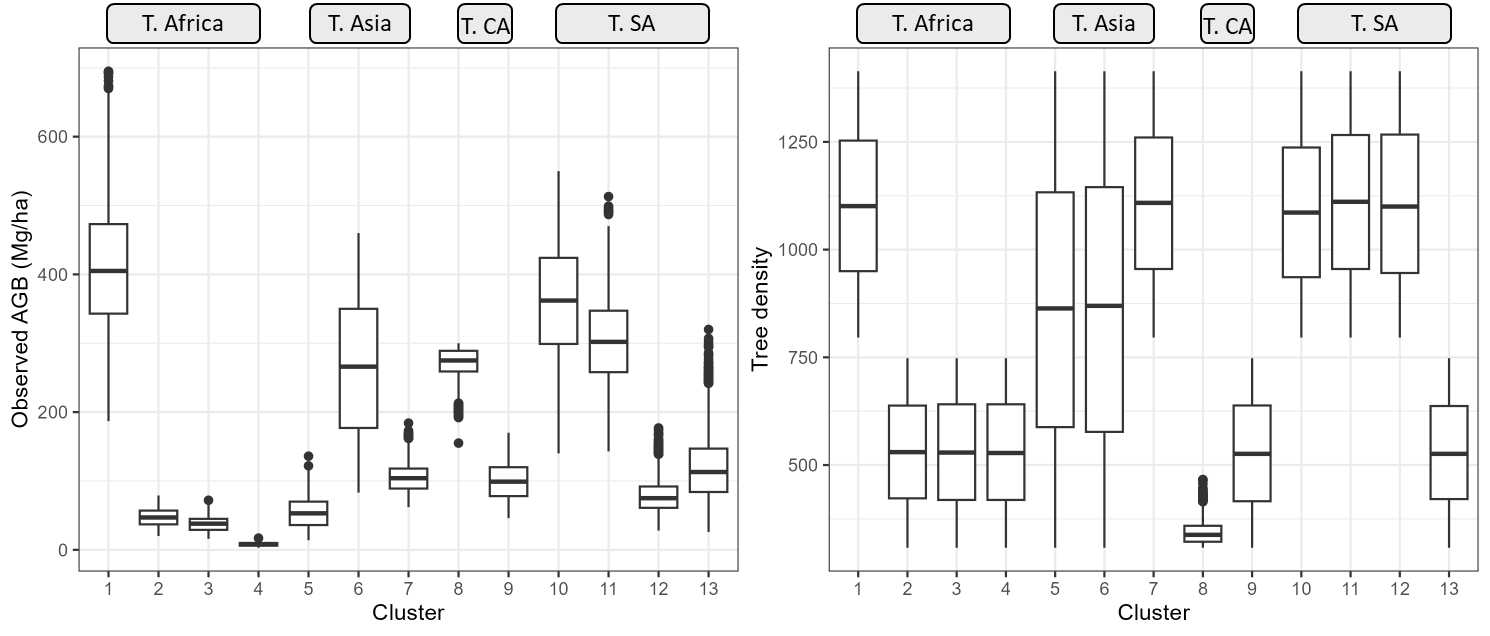


Fig. 3S. Box plots for the observed aboveground biomass and tree density (trees ha-1) of the 5000 forests simulated for each cluster. T. is Tropical. CA is Central America. SA is South America.

Table 1S.Forest type and structure, and climatic conditions of the clusters.

| **Cluster** | **Level** | **Forest type** | **Tree height class (m)** |
| --- | --- | --- | --- |
| 1 | 5 | Moist forest | <10 m; ≥20 m |
| 2 | 4 | Dry forest | <10 m; 10–20 m |
| 3 | 3 | Dry forest | <10 m |
| 4 | 1 | Dry forest | <10 m |
| 5 | 6 | Dry forest; Moist forest | <10 m; 10–20 m |
| 6 | 6 | Dry forest; Wet forest | <10 m; 10–20 m |
| 7 | 5 | Wet forest | <10 m; 10–20 m; ≥20 m |
| 8 | 6 | Dry forest; Moist forest; Wet forest | <10 m; 10–20 m; ≥20 m |
| 9 | 4 | Dry forest | <10 m; 10–20 m |
| 10 | 5 | Moist forest | <10 m; 10–20 m; ≥20 m |
| 11 | 5 | Wet forest | <10 m; ≥20 m |
| 12 | 1 | Moist forest | ≥20 m |
| 13 | 5 | Dry forest | <10 m; ≥20 m |

Table 2S. Spearman’s correlation (*n*=5000 per cluster) for stand attributes of the simulated plots.

| Cluster |  | Mean Dbh | Max. Dbh | Stand AGB | Basal area | Tree density | Lorey’s height |
| --- | --- | --- | --- | --- | --- | --- | --- |
| 1 | Mean Dbh | 1.00 |  |  |  |  |  |
| 1 | Max. Dbh | 0.03 | 1.00 |  |  |  |  |
| 1 | Stand AGB | 0.11 | 0.45 | 1.00 |  |  |  |
| 1 | Basal area | 0.12 | 0.39 | 0.94 | 1.00 |  |  |
| 1 | Tree density | 0.03 | 0.13 | 0.74 | 0.87 | 1.00 |  |
| 1 | Lorey’s height | 0.04 | 0.68 | 0.58 | 0.44 | 0.01 | 1.00 |
| 2 | Mean Dbh | 1.00 |  |  |  |  |  |
| 2 | Max. Dbh | 0.05 | 1.00 |  |  |  |  |
| 2 | Stand AGB | 0.09 | 0.21 | 1.00 |  |  |  |
| 2 | Basal area | 0.08 | 0.20 | 0.99 | 1.00 |  |  |
| 2 | Tree density | -0.01 | 0.17 | 0.95 | 0.97 | 1.00 |  |
| 2 | Lorey’s height | 0.12 | 0.20 | 0.24 | 0.15 | 0.03 | 1.00 |
| 3 | Mean Dbh | 1.00 |  |  |  |  |  |
| 3 | Max. Dbh | 0.01 | 1.00 |  |  |  |  |
| 3 | Stand AGB | 0.11 | 0.38 | 1.00 |  |  |  |
| 3 | Basal area | 0.11 | 0.30 | 0.99 | 1.00 |  |  |
| 3 | Tree density | 0.00 | 0.20 | 0.94 | 0.97 | 1.00 |  |
| 3 | Lorey’s height | 0.14 | 0.61 | 0.31 | 0.21 | 0.04 | 1.00 |
| 4 | Mean Dbh | 1.00 |  |  |  |  |  |
| 4 | Max. Dbh | 0.01 | 1.00 |  |  |  |  |
| 4 | Stand AGB | 0.10 | 0.32 | 1.00 |  |  |  |
| 4 | Basal area | 0.09 | 0.29 | 0.98 | 1.00 |  |  |
| 4 | Tree density | 0.01 | 0.22 | 0.94 | 0.98 | 1.00 |  |
| 4 | Lorey’s height | 0.14 | 0.42 | 0.30 | 0.22 | 0.06 | 1.00 |
| 5 | Mean Dbh | 1.00 |  |  |  |  |  |
| 5 | Max. Dbh | 0.04 | 1.00 |  |  |  |  |
| 5 | Stand AGB | 0.08 | 0.46 | 1.00 |  |  |  |
| 5 | Basal area | 0.07 | 0.39 | 0.99 | 1.00 |  |  |
| 5 | Tree density | 0.02 | 0.32 | 0.97 | 0.99 | 1.00 |  |
| 5 | Lorey’s height | 0.12 | 0.72 | 0.31 | 0.21 | 0.10 | 1.00 |
| 6 | Mean Dbh | 1.00 |  |  |  |  |  |
| 6 | Max. Dbh | 0.03 | 1.00 |  |  |  |  |
| 6 | Stand AGB | 0.03 | 0.33 | 1.00 |  |  |  |
| 6 | Basal area | 0.03 | 0.33 | 1.00 | 1.00 |  |  |
| 6 | Tree density | -0.01 | 0.32 | 1.00 | 1.00 | 1.00 |  |
| 6 | Lorey’s height | 0.22 | 0.14 | 0.04 | 0.03 | -0.01 | 1.00 |
| 7 | Mean Dbh | 1.00 |  |  |  |  |  |
| 7 | Max. Dbh | -0.01 | 1.00 |  |  |  |  |
| 7 | Stand AGB | 0.11 | 0.30 | 1.00 |  |  |  |
| 7 | Basal area | 0.11 | 0.22 | 0.96 | 1.00 |  |  |
| 7 | Tree density | 0.01 | 0.12 | 0.90 | 0.97 | 1.00 |  |
| 7 | Lorey’s height | 0.12 | 0.54 | 0.36 | 0.22 | 0.03 | 1.00 |
| 8 | Mean Dbh | 1.00 |  |  |  |  |  |
| 8 | Max. Dbh | -0.03 | 1.00 |  |  |  |  |
| 8 | Stand AGB | 0.22 | 0.20 | 1.00 |  |  |  |
| 8 | Basal area | 0.24 | 0.03 | 0.91 | 1.00 |  |  |
| 8 | Tree density | -0.18 | -0.07 | 0.39 | 0.49 | 1.00 |  |
| 8 | Lorey’s height | 0.02 | 0.19 | 0.37 | 0.18 | -0.37 | 1.00 |
| 9 | Mean Dbh | 1.00 |  |  |  |  |  |
| 9 | Max. Dbh | 0.01 | 1.00 |  |  |  |  |
| 9 | Stand AGB | 0.11 | 0.30 | 1.00 |  |  |  |
| 9 | Basal area | 0.11 | 0.27 | 0.99 | 1.00 |  |  |
| 9 | Tree density | -0.01 | 0.22 | 0.96 | 0.97 | 1.00 |  |
| 9 | Lorey’s height | 0.13 | 0.27 | 0.24 | 0.15 | 0.01 | 1.00 |
| 10 | Mean Dbh | 1.00 |  |  |  |  |  |
| 10 | Max. Dbh | 0.03 | 1.00 |  |  |  |  |
| 10 | Stand AGB | 0.07 | 0.37 | 1.00 |  |  |  |
| 10 | Basal area | 0.08 | 0.36 | 0.88 | 1.00 |  |  |
| 10 | Tree density | 0.05 | 0.13 | 0.60 | 0.80 | 1.00 |  |
| 10 | Lorey’s height | 0.02 | 0.49 | 0.62 | 0.42 | -0.07 | 1.00 |
| 11 | Mean Dbh | 1.00 |  |  |  |  |  |
| 11 | Max. Dbh | -0.01 | 1.00 |  |  |  |  |
| 11 | Stand AGB | 0.11 | 0.25 | 1.00 |  |  |  |
| 11 | Basal area | 0.10 | 0.29 | 0.98 | 1.00 |  |  |
| 11 | Tree density | 0.01 | 0.12 | 0.82 | 0.85 | 1.00 |  |
| 11 | Lorey’s height | 0.05 | 0.32 | 0.43 | 0.41 | 0.01 | 1.00 |
| 12 | Mean Dbh | 1.00 |  |  |  |  |  |
| 12 | Max. Dbh | 0.03 | 1.00 |  |  |  |  |
| 12 | Stand AGB | 0.11 | 0.52 | 1.00 |  |  |  |
| 12 | Basal area | 0.12 | 0.48 | 0.86 | 1.00 |  |  |
| 12 | Tree density | 0.03 | 0.15 | 0.57 | 0.85 | 1.00 |  |
| 12 | Lorey’s height | 0.07 | 0.74 | 0.76 | 0.51 | 0.03 | 1.00 |
| 13 | Mean Dbh | 1.00 |  |  |  |  |  |
| 13 | Max. Dbh | 0.04 | 1.00 |  |  |  |  |
| 13 | Stand AGB | 0.10 | 0.65 | 1.00 |  |  |  |
| 13 | Basal area | 0.11 | 0.56 | 0.97 | 1.00 |  |  |
| 13 | Tree density | 0.03 | 0.20 | 0.64 | 0.78 | 1.00 |  |
| 13 | Lorey’s height | 0.04 | 0.75 | 0.72 | 0.58 | 0.04 | 1.00 |

**Table 3S.** Parameter estimates of Models 1–6 for all continents and the pantropical zone.

| With Lorey’s height | | | | | | | |
| --- | --- | --- | --- | --- | --- | --- | --- |
| Continent | Model |  |  |  |  |  | m70 |
| Africa | 1 | 6.1493 | 1.9628 | -1.0098 | 0.1233 | -0.1048 | 14000 |
| Asia | 1 | 8.0522 | 1.5683 | -0.6318 | -1.3196 | 0.1869 | 10500 |
| Central America | 1 | -0.2865 | 0.8354 | 0.1635 | 0.5951 | -0.0125 | 7000 |
| South America | 1 | -4.4710 | 0.7020 | 0.2803 | 1.5340 | 0.1440 | 14000 |
| **Pantropical zone** | **1** | **-0.3066** | **1.0361** | **0.0740** | **0.7618** | **-0.1154** | **45500** |
| Africa | 2 | 5.0647 | 1.7699 | -0.8787 | 0.2273 | - | 14000 |
| Asia | 2 | 7.3876 | 1.5519 | -0.6076 | -0.8902 | - | 10500 |
| Central America | 2 | -0.3092 | 0.8348 | 0.1635 | 0.5851 | - | 7000 |
| South America | 2 | -4.9777 | 0.6672 | 0.3340 | 1.8233 | - | 14000 |
| **Pantropical zone** | **2** | **-0.5257** | **1.0166** | **0.0762** | **0.6808** | **-** | **45500** |
| Africa | 3 | -0.3622 | 1.0021 | - | 0.8319 | - | 14000 |
| Asia | 3 | 5.4807 | 1.3004 | - | -1.4309 | - | 10500 |
| Central America | 3 | 1.0087 | 0.9884 | - | 0.3225 | - | 7000 |
| South America | 3 | -1.1944 | 0.9073 | - | 1.1394 | - | 14000 |
| **Pantropical zone** | **3** | **-0.0616** | **1.0451** | **-** | **0.6671** | **-** | **45500** |
| Without Lorey’s height | | | | | | | |
| Africa | 4 | 7.1431 | 2.1186 | -1.1618 | - | -0.1201 | 14000 |
| Asia | 4 | 5.0864 | 1.5483 | -0.6608 | - | 0.0235 | 10500 |
| Central America | 4 | 1.3189 | 1.0715 | -0.0846 | - | 0.2109 | 7000 |
| South America | 4 | 0.9991 | 1.0550 | -0.1850 | - | 0.4821 | 14000 |
| **Pantropical zone** | **4** | **0.3553** | **1.3199** | **0.0187** | **-** | **0.1549** | **45500** |
| Africa | 5 | 6.8228 | 2.0385 | -1.1583 | - | - | 14000 |
| Asia | 5 | 5.1392 | 1.5465 | -0.6549 | - | - | 10500 |
| Central America | 5 | 2.5109 | 1.1810 | -0.1836 | - | - | 7000 |
| South America | 5 | 4.1527 | 1.2463 | -0.3897 | - | - | 14000 |
| **Pantropical zone** | **5** | **0.8729** | **1.4087** | **0.0042** | **-** | **-** | **45500** |
| Africa | 6 | 0.3847 | 1.5803 | - | - | - | 14000 |
| Asia | 6 | 1.4371 | 1.2584 | - | - | - | 10500 |
| Central America | 6 | 1.2658 | 1.2249 | - | - | - | 7000 |
| South America | 6 | 1.9189 | 1.1038 | - | - | - | 14000 |
| **Pantropical zone** | **6** | **0.8972** | **1.4099** | **-** | **-** | **-** | **45500** |
